# Supplementary material for: A Novel Mechanomyography (MMG) Sensor Based on Piezo-Resistance Principle and with a Pyramidic Microarray
Source: MDPI journal article supplement (doi:10.3390/mi14101859), 2023-09-28
Supplement: s1 [file s1]

(a)

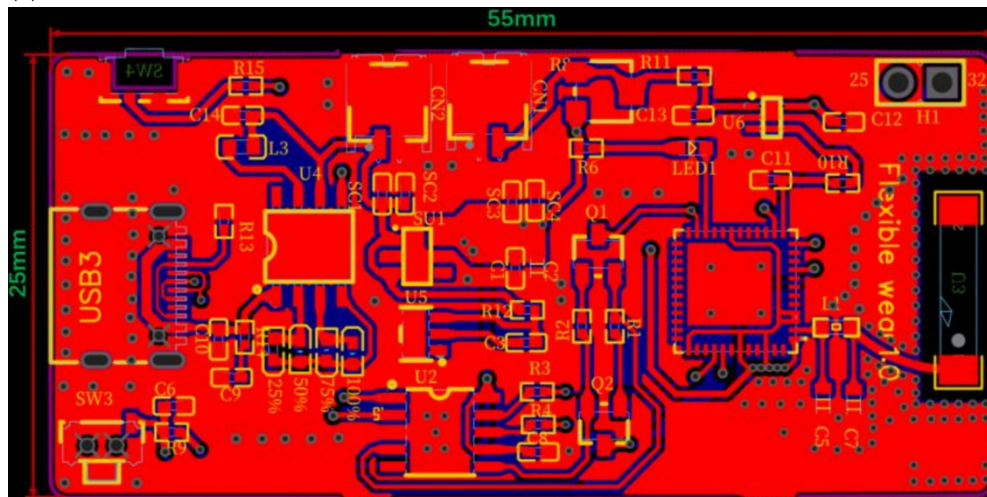

(b)

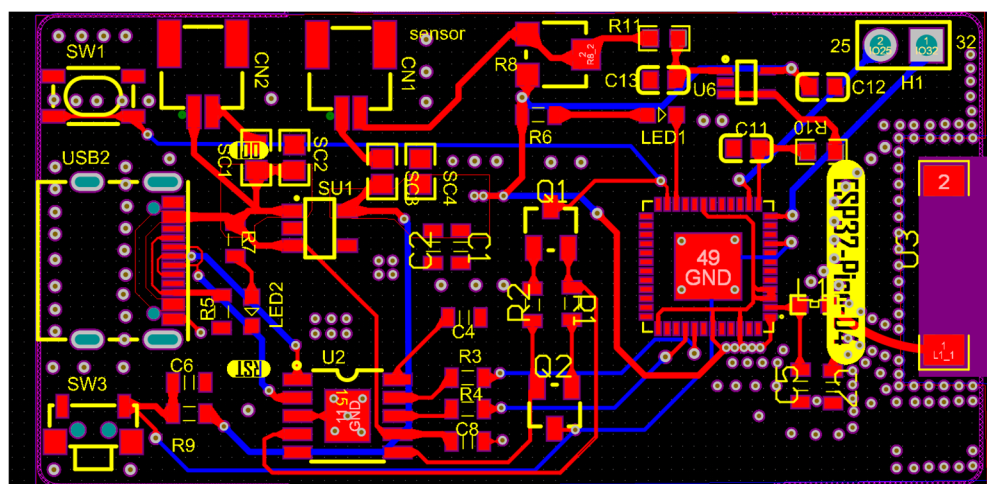

(c)

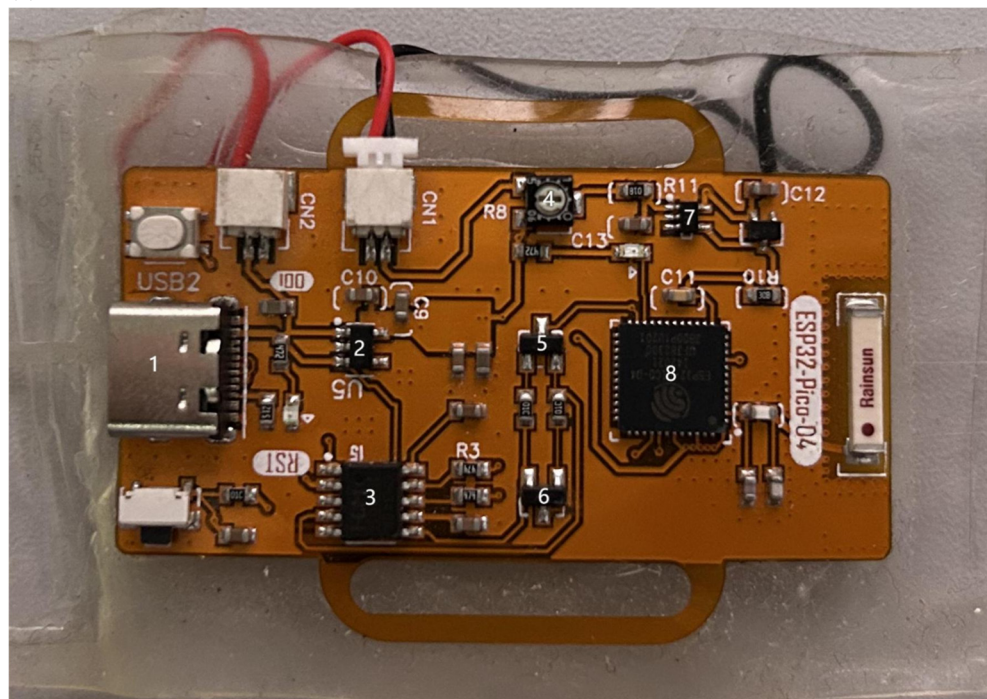

(d)

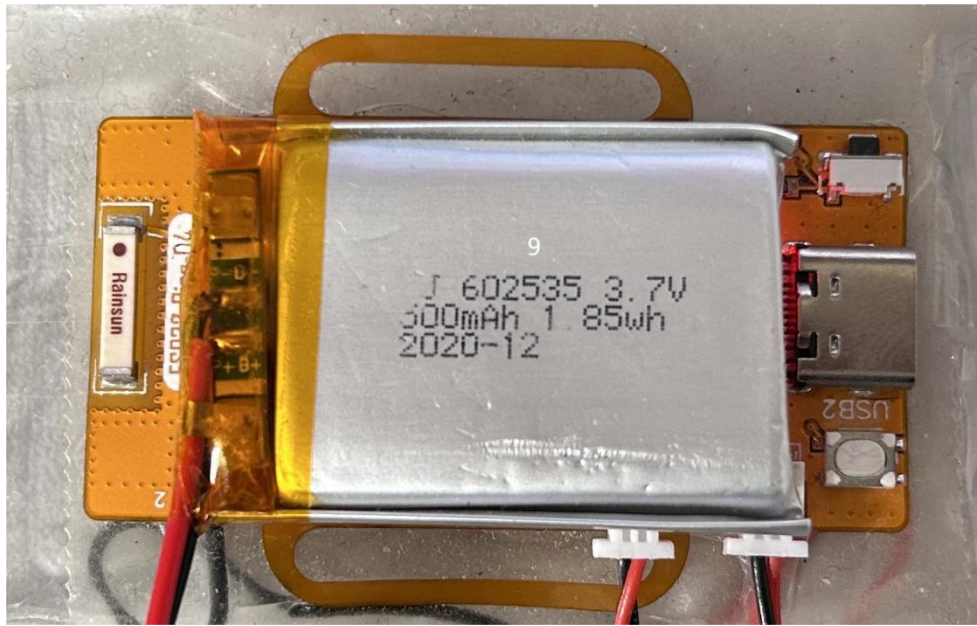

**Supplementary Figure S1 | Layouts of the FPC board.** (a) Layouts of the FPC board with coppering (b) Layouts of the FPC board without coppering (c) Photos of the FPC board with key components (Supplementary Table S1) labeled (d) Photos of power supply module connecting with FPC board.

**Supplementary Table S1 | Key components used in the control electronics.** All of the components are commercially off the shelf.

| Component designator | Description              | Manufacture product number |
|----------------------|--------------------------|----------------------------|
| 1                    | USB connector            | TYPE-C 16PIN               |
| 2                    | Voltage regulator        | SPX3819M5-L-2.2/TD         |
| 3                    | USB chip                 | CH340K                     |
| 4                    | Variable resistor        | G32AT-B105                 |
| 5,6                  | Transistor (NPN)         | S8050-J3Y                  |
| 7                    | Operational amplifier    | AD8555ARZ                  |
| 8                    | MCU and bluetooth module | ESP32-PICO-D4              |
| 9                    | Power supply module      | Li battery                 |
